# Supplementary material for: Blue-emitting butterfly-shaped donor–acceptor-type 1,3,5,9-tetraarylpyrenes: easily available, low-cost conventional fluorophores for high-performance near ultraviolet electroluminescence with CIEy < 0.05
Source: Royal Society of Chemistry journal article supplement (doi:10.1039/d0tc03612a), 2020-11-16
Supplement: d0tc03612a1.pdf [file d0tc03612a1.pdf]

## Supporting Information for

# Blue-Emitting Butterfly-Shaped Donor–Acceptor-Type 1,3,5,9-Tetraarylpyrenes: Easily Available, Low-Cost Conventional Fluorophores for High-Performance Near Ultraviolet Electroluminescence with $CIE_y < 0.05$

Huijuan Ran,<sup>a</sup> Zhen Zhao,<sup>a</sup> Xuewei Duan,<sup>a</sup> Fuli Xie,<sup>a</sup> Ruijun Han,<sup>a</sup> Huaming Sun,<sup>b</sup> and Jian-Yong Hu\*<sup>a</sup>

<sup>a</sup>Key Laboratory of Applied Surface and Colloid Chemistry, National Ministry of Education; Shaanxi Key Laboratory for Advanced Energy Devices; Shaanxi Engineering Lab for Advanced Energy Technology, School of Materials Science and Engineering, Shaanxi Normal University, Xian 710119, China.

<sup>b</sup>National Demonstration Center for Experimental Chemistry Education, School of Chemistry and Chemical Engineering, Shaanxi Normal University, Xian 710119, China.

## 1. Materials and Methods

All materials were obtained from commercial suppliers and used without purification unless otherwise noted. 7-*tert*-Butyl-5,9-bis(4-methoxyphenyl)-1,3-diphenylpyrene (**3c**) was synthesized according to the reported procedure.<sup>1</sup>

<sup>1</sup>H/<sup>13</sup>C NMR spectra (300 MHz) were recorded on a JEOL 300 MHz FT-300 NMR spectrometer referenced to 7.26 and 77.0 ppm for chloroform-D solvent with SiMe<sub>4</sub> as an internal reference: *J*-values are given in Hz. Mass spectra were obtained with a Bruker microflex mass spectrometer in MALDI-TOF mode. Elemental analyses were performed by Vario EL III Elementar Analysensysteme GmbH. Thermogravimetric analysis (TGA) was performed using a USA Waters Q600 under nitrogen atmosphere at a heating rate of 10 °C min<sup>-1</sup>. Differential scanning calorimetry (DSC) was performed using a METTLER TOLEDO DSC instrument under nitrogen atmosphere at a heating rate of 10 °C min<sup>-1</sup>. UV-vis absorption spectra were measured on a PerkinElmer UV-Lambda 950 spectrophotometer. Photoluminescence spectra were recorded on a Shimadzu F-7000 spectrofluorometer. Fluorescence quantum yields were measured using absolute methods with a Japan Hamamatsu C9920-06G. Fluorescence lifetimes were determined with a Edinburgh FLS1000 Quantaaurus-Tau time-resolved spectrometer. The frontier orbitals of the molecules based on the ground state geometries were calculated at

B3LYP/6-31G\* by Gaussian 16 program. Cyclic voltamograms were measured on a CHI 610E A14297 in a solution of *tetra-n*-butylammonium hexafluorophosphate (Bu<sub>4</sub>NPF<sub>6</sub>) (0.1 M) in a typical three-electrode cell with a platinum sheet working electrode, a platinum wire counter electrode, and a silver/Silver chloride (Ag/Ag<sup>+</sup>) reference electrode in dichloromethane at a scan rate of 100 mV s<sup>-1</sup> at room temperature under N<sub>2</sub> atmosphere. X-ray diffraction patterns were collected using an X-ray diffractometer from Rigaku Japan. The data collection from single crystal was conducted using a Bruker D8 venture diffractometer, equipped with graphite-monochromated Cu K  $\alpha$  radiation ( $\lambda = 1.54178 \text{ \AA}$ ).

## 2. Device fabrication and characterization

Multilayer OLEDs were fabricated by the vacuum-deposition method. Electronic grade HAT-CN, TAPC, CBP, DSA-Ph, B3PyPB and LiF were obtained from commercial sources. **3a-c** were purified by vacuum sublimation. Commercial ITO-coated glass was used as the starting substrate. Before device fabrication, the ITO glass was pre-cleaned carefully and treated with UV/O<sub>3</sub> for 2 min. Organic layers were deposited by high-vacuum ( $1 \times 10^{-5}$  Pa) thermal evaporation onto a glass substrate pre-coated with an ITO layer. All organic layers were deposited sequentially. HAT-CN was used as the hole-injecting layer. TAPC was used as the hole-transporting layer. CBP and **3c** was used as the hosts. **3a-**

c and DSA-Ph were used as the dopants. B3PyPB was used as the electron-transporting layer and LiF/Al was used as the cathode. The thermal deposition rates for the organic materials, LiF and Al were 1.0, 0.1 and 3.0 Å s<sup>-1</sup>, respectively. The active area of each device was 9 mm<sup>2</sup>. The thicknesses of the organic materials and the cathode layers were controlled using a quartz-crystal thickness monitor. The electroluminescence spectra, the current density-voltage characteristics and the current density-voltage-luminance curves characterizations of the OLEDs were carried out with a Photo Research SpectraScan PR-650 Spectroradiometer and a Keithley 2400 Source Meter and they are recorded simultaneously. All measurements were carried out on the devices without encapsulations in ambient atmosphere in the dark.

### 3. Synthesis

#### *Synthesis of 7-tert-Butyl-5,9-bis(4-methylphenyl)-1,3-diphenylpyrene*

**(3a)**: A mixture of 7-*tert*-butyl-1,3-diphenyl-5,9-dibromopyrene (500 mg, 0.88 mmol), 4-methylphenylboronic acid (359 mg, 2.64 mmol) in toluene (50 mL), and ethanol (30 mL) at room temperature was stirred under N<sub>2</sub> atmosphere, and a 2.0 M aqueous solution of K<sub>2</sub>CO<sub>3</sub> (20 mL) and [Pd(PPh<sub>3</sub>)<sub>4</sub>] (170 mg) were added. The mixture was heated to 110 °C under stirring for 16 h. After cooling to room temperature, the mixture was quenched with water, extracted with toluene, and washed with water and brine. The organic extracts were dried with MgSO<sub>4</sub>, and the solvent

was evaporated. The residue was purified by column chromatography eluting with CH<sub>2</sub>Cl<sub>2</sub>/n-hexane (v/v, 1/6) and recrystallized from CH<sub>2</sub>Cl<sub>2</sub>/hexane (v/v, 1/1) to give **3a** (380 mg, 73%) as a light-yellow powder. Mp 316 °C.  $\nu_{\max}$  (KBr)/cm<sup>-1</sup> 3026.40, 2963.70, 2864.90, 2363.30, 2342.60, 1590.77, 1444.07, 1365.99, 1251.24, 1172.56, 1109.86, 1046.16, 901.05, 822.97, 765.59, 702.89, 614.16, 592.86. <sup>1</sup>H NMR (300 MHz, CDCl<sub>3</sub>):  $\delta$  = 1.38 (s, 9H, *t*Bu), 2.48 (s, 6H, Me), 7.33 (m, 4H, Ar-H), 7.42 (d, *J* = 7.2 Hz, 2H, Ar-H), 7.52 (m, 8H, Ar-H), 7.68 (d, *J* = 6.9 Hz, 4H, Ar-H), 7.96 (s, 1H, pyrene-H), 8.14 (s, 2H, pyrene-H), 8.32 (s, 2H, pyrene-H) ppm. <sup>13</sup>C NMR (100 MHz, CDCl<sub>3</sub>):  $\delta$  = 148.60, 141.26, 139.80, 138.52, 137.12, 130.68, 130.10, 129.16, 128.50, 127.43, 127.24, 125.58, 124.42, 124.23, 121.47, 35.53, 31.80, 21.39. MS: *m/z* calcd. for C<sub>46</sub>H<sub>38</sub> 590.79; Found 590.30 [M<sup>+</sup>]. Anal. calcd for C<sub>46</sub>H<sub>38</sub>: C, 93.56; H, 6.44; found: C, 93.58; H, 6.42.

***Synthesis of 7-tert-Butyl-5,9-bis(4-tert-butylphenyl)-1,3-diphenylpyrene***

**(3b)**: A mixture of 7-*tert*-butyl-1,3-diphenyl-5,9-dibromopyrene (430 mg, 0.76 mmol), 4-*tert*-butylphenylboronic acid (406 mg, 2.28 mmol) in toluene (50 mL), and ethanol (30 mL) at room temperature was stirred under N<sub>2</sub> atmosphere, and a 2.0 M aqueous solution of K<sub>2</sub>CO<sub>3</sub> (20 mL) and [Pd(PPh<sub>3</sub>)<sub>4</sub>] (170 mg) were added. The mixture was heated to 110 °C under stirring for 16 h. After cooling to room temperature, the mixture was quenched with water, extracted with toluene, and washed with water

and brine. The organic extracts were dried with  $\text{MgSO}_4$ , and the solvent was evaporated. The residue was purified by column chromatography eluting with  $\text{CH}_2\text{Cl}_2/\text{n-hexane}$  (v/v, 1/6) and recrystallized from  $\text{CH}_2\text{Cl}_2/\text{hexane}$  (v/v, 1/1) to give **3b** (320 mg, 68%) as a white powder. Mp. 363 °C.  $\nu_{\text{max}}$  (KBr)/ $\text{cm}^{-1}$  3024.31, 2964.83, 2897.83, 2864.70, 2352.76, 1788.12, 1595.40, 1502.80, 1462.90, 1395.89, 1362.77, 1270.17, 1183.59, 1117.34, 1010.43, 897.50, 831.25, 758.23, 704.78, 605.39, 558.72.  $^1\text{H}$  NMR (300 MHz,  $\text{CDCl}_3$ ):  $\delta$  = 1.39 (s, 9H, *t*Bu), 1.43 (s, 18H, *t*Bu), 7.56 (m, 14H, Ar-H), 7.70 (d,  $J$  = 6.9 Hz, 4H, Ar-H), 7.95 (s, 1H, pyrene-H), 8.16 (s, 2H, pyrene-H), 8.37 (s, 2H, pyrene-H) ppm.  $^{13}\text{C}$  NMR (100 MHz,  $\text{CDCl}_3$ ):  $\delta$  = 150.24, 148.48, 141.22, 139.63, 138.34, 136.97, 130.63, 129.80, 128.42, 128.21, 127.36, 127.13, 125.57, 125.36, 123.23, 121.40, 35.45, 34.66, 33.01, 31.54, 31.46. MS:  $m/z$  calcd. for  $\text{C}_{52}\text{H}_{50}$  674.95; Found 674.40 [ $\text{M}^+$ ]. Anal. calcd for  $\text{C}_{52}\text{H}_{50}$ : C, 92.58; H, 7.42; found: C, 92.55; H, 7.45.

#### 4. Thermal properties

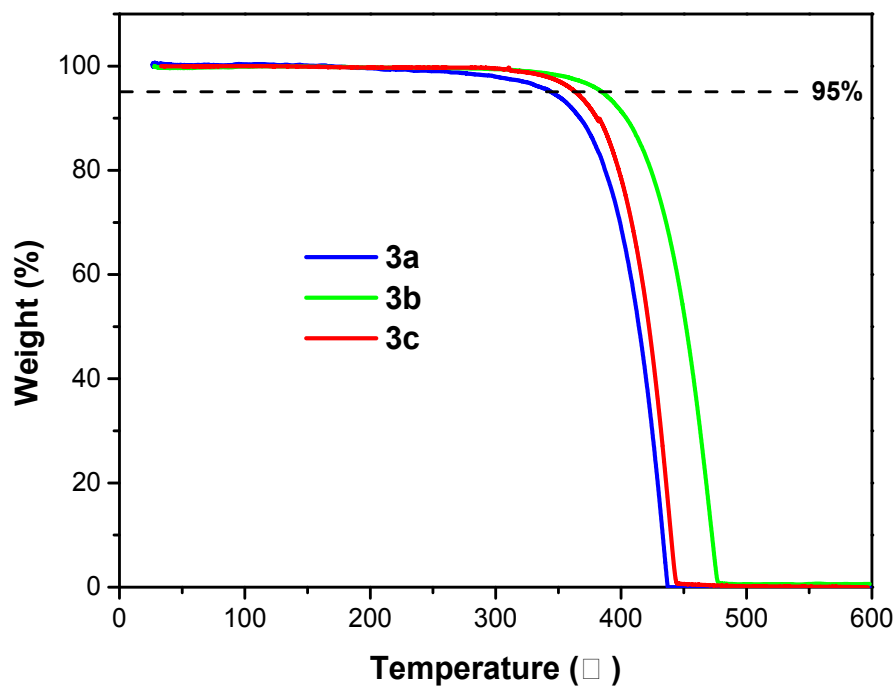

Figure S1. TGA thermograms of the compounds **3a-c** in N<sub>2</sub> atmosphere.

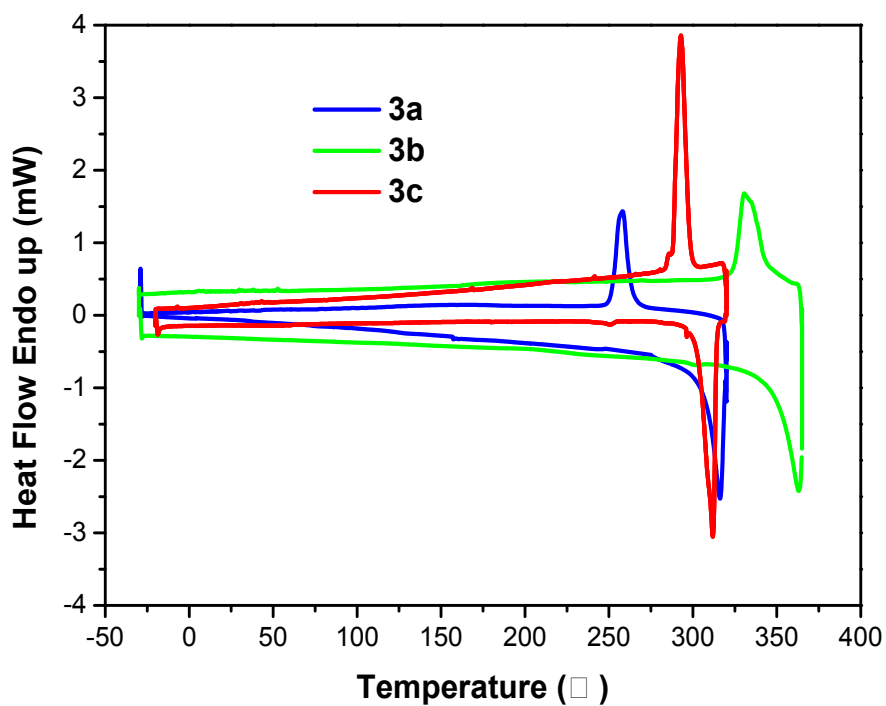

Figure S2. DSC thermograms of the compounds **3a-c** in N<sub>2</sub> atmosphere.

## 5. DFT calculations

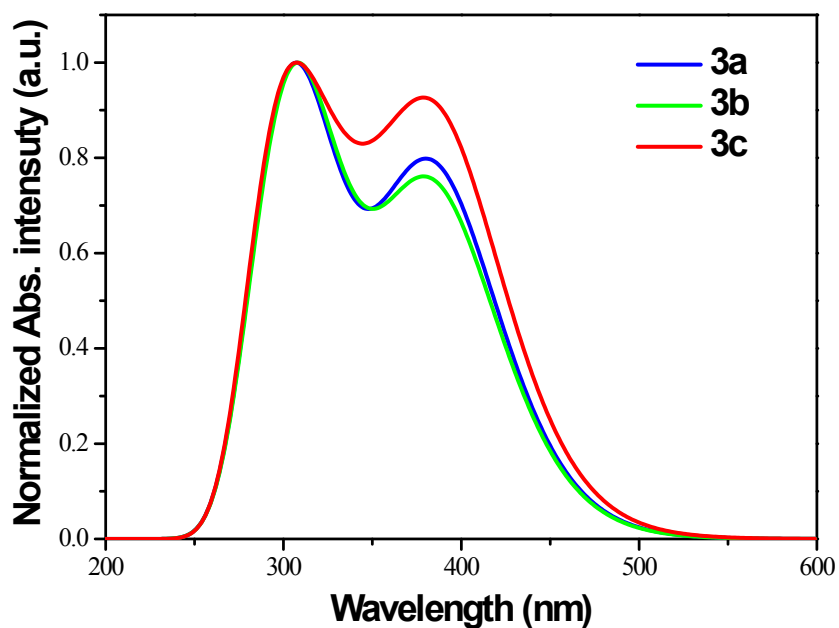

Figure S3. The computed UV-Vis absorption spectra of compounds **3a-c**.

Table S1-1 Atom coordinates and absolute energies for **3a** standard orientation.

| Center Number | Atomic Number | Atomic Type | Coordinates (Angstroms) |           |           |
|---------------|---------------|-------------|-------------------------|-----------|-----------|
|               |               |             | X                       | Y         | Z         |
| 1             | 6             | 0           | 0.035898                | -3.461995 | -0.072191 |
| 2             | 6             | 0           | -1.168933               | -2.757479 | -0.089146 |
| 3             | 6             | 0           | -1.220634               | -1.352676 | -0.036605 |
| 4             | 6             | 0           | -0.000242               | -0.607546 | -0.029241 |
| 5             | 6             | 0           | 1.242197                | -1.320594 | -0.022066 |
| 6             | 6             | 0           | 1.223893                | -2.722431 | -0.019285 |
| 7             | 6             | 0           | -2.48023                | -0.63278  | -0.001596 |
| 8             | 6             | 0           | -0.019616               | 0.823185  | -0.024036 |
| 9             | 6             | 0           | -1.271306               | 1.512889  | -0.054843 |
| 10            | 6             | 0           | -2.474957               | 0.736173  | -0.024866 |
| 11            | 6             | 0           | -1.278588               | 2.931844  | -0.047495 |
| 12            | 6             | 0           | -0.058791               | 3.611875  | 0.013641  |
| 13            | 6             | 0           | 1.181034                | 2.964375  | 0.030645  |
| 14            | 6             | 0           | 1.212632                | 1.546894  | 0.018405  |
| 15            | 6             | 0           | 2.436497                | 0.80179   | 0.067289  |



|    |   |   |           |           |           |
|----|---|---|-----------|-----------|-----------|
| 16 | 6 | 0 | 2.481853  | -0.564855 | 0.023821  |
| 17 | 1 | 0 | 3.370046  | 1.350213  | 0.116391  |
| 18 | 1 | 0 | -2.105805 | -3.295118 | -0.141017 |
| 19 | 1 | 0 | 2.172531  | -3.243726 | 0.025765  |
| 20 | 1 | 0 | -3.422365 | 1.259902  | 0.03213   |
| 21 | 1 | 0 | -0.072104 | 4.697796  | -0.009642 |
| 22 | 6 | 0 | 2.411365  | 3.805838  | 0.040282  |
| 23 | 6 | 0 | 2.588872  | 4.781918  | 1.034809  |
| 24 | 6 | 0 | 3.389569  | 3.694469  | -0.962758 |
| 25 | 6 | 0 | 3.710111  | 5.611657  | 1.034369  |
| 26 | 1 | 0 | 1.844163  | 4.87757   | 1.820551  |
| 27 | 6 | 0 | 4.510453  | 4.524375  | -0.964275 |
| 28 | 1 | 0 | 3.258028  | 2.963556  | -1.755595 |
| 29 | 6 | 0 | 4.676434  | 5.485087  | 0.035179  |
| 30 | 1 | 0 | 3.829924  | 6.355214  | 1.818153  |
| 31 | 1 | 0 | 5.251489  | 4.424679  | -1.753159 |
| 32 | 1 | 0 | 5.55038   | 6.130981  | 0.033615  |
| 33 | 6 | 0 | -2.530027 | 3.736921  | -0.120852 |
| 34 | 6 | 0 | -2.788594 | 4.729842  | 0.838705  |
| 35 | 6 | 0 | -3.45017  | 3.57288   | -1.170543 |
| 36 | 6 | 0 | -3.931502 | 5.525255  | 0.758583  |
| 37 | 1 | 0 | -2.090765 | 4.865166  | 1.660738  |
| 38 | 6 | 0 | -4.592437 | 4.368736  | -1.252103 |
| 39 | 1 | 0 | -3.254605 | 2.828101  | -1.936914 |
| 40 | 6 | 0 | -4.838899 | 5.347065  | -0.286933 |
| 41 | 1 | 0 | -4.114718 | 6.282297  | 1.516746  |
| 42 | 1 | 0 | -5.287026 | 4.22933   | -2.076501 |
| 43 | 1 | 0 | -5.729581 | 5.966398  | -0.35051  |
| 44 | 6 | 0 | -3.790282 | -1.3399   | 0.083224  |
| 45 | 6 | 0 | -4.08705  | -2.222675 | 1.136158  |
| 46 | 6 | 0 | -4.793724 | -1.095313 | -0.86518  |
| 47 | 6 | 0 | -5.33546  | -2.8322   | 1.23026   |
| 48 | 1 | 0 | -3.334901 | -2.419107 | 1.895259  |
| 49 | 6 | 0 | -6.042081 | -1.710451 | -0.767904 |
| 50 | 1 | 0 | -4.58584  | -0.425282 | -1.695098 |
| 51 | 6 | 0 | -6.338103 | -2.588049 | 0.280777  |
| 52 | 1 | 0 | -5.53811  | -3.505753 | 2.060552  |
| 53 | 1 | 0 | -6.797231 | -1.507015 | -1.524173 |
| 54 | 6 | 0 | 3.813804  | -1.235851 | 0.033327  |
| 55 | 6 | 0 | 4.222739  | -2.080078 | -1.013219 |
| 56 | 6 | 0 | 4.725273  | -0.994021 | 1.071323  |
| 57 | 6 | 0 | 5.490347  | -2.657414 | -1.01488  |

|    |   |   |           |           |           |
|----|---|---|-----------|-----------|-----------|
| 58 | 1 | 0 | 3.544244  | -2.272278 | -1.840003 |
| 59 | 6 | 0 | 5.99294   | -1.57614  | 1.0657    |
| 60 | 1 | 0 | 4.429327  | -0.352967 | 1.89735   |
| 61 | 6 | 0 | 6.400815  | -2.416532 | 0.02369   |
| 62 | 1 | 0 | 5.780823  | -3.302489 | -1.841683 |
| 63 | 1 | 0 | 6.674782  | -1.376222 | 1.889536  |
| 64 | 6 | 0 | 0.098817  | -5.001106 | -0.098028 |
| 65 | 6 | 0 | 0.925491  | -5.464691 | -1.321059 |
| 66 | 6 | 0 | 0.776228  | -5.506815 | 1.198081  |
| 67 | 6 | 0 | -1.297251 | -5.645317 | -0.193514 |
| 68 | 1 | 0 | 0.465456  | -5.124836 | -2.256111 |
| 69 | 1 | 0 | 1.949829  | -5.078955 | -1.29193  |
| 70 | 1 | 0 | 0.982714  | -6.559834 | -1.349092 |
| 71 | 1 | 0 | 0.205077  | -5.202242 | 2.082602  |
| 72 | 1 | 0 | 0.838044  | -6.602135 | 1.193758  |
| 73 | 1 | 0 | 1.793106  | -5.115505 | 1.306318  |
| 74 | 1 | 0 | -1.198251 | -6.736603 | -0.213511 |
| 75 | 1 | 0 | -1.927459 | -5.386876 | 0.664846  |
| 76 | 1 | 0 | -1.82441  | -5.344084 | -1.105832 |
| 77 | 6 | 0 | -7.697556 | -3.235944 | 0.40314   |
| 78 | 1 | 0 | -7.616328 | -4.289296 | 0.695026  |
| 79 | 1 | 0 | -8.310034 | -2.737073 | 1.166119  |
| 80 | 1 | 0 | -8.249711 | -3.189388 | -0.541117 |
| 81 | 6 | 0 | 7.7834    | -3.025672 | 0.002482  |
| 82 | 1 | 0 | 8.462257  | -2.45209  | -0.642929 |
| 83 | 1 | 0 | 8.226669  | -3.047797 | 1.003431  |
| 84 | 1 | 0 | 7.764983  | -4.051798 | -0.381697 |

-----  
Total Energy (RB3LYP) = -1775.87712461 Harterr

**Table S1-2** Atom coordinates and absolute energies for **3b** Standard orientation.

| Center<br>Number | Atomic<br>Number | Atomic<br>Type | Coordinates (Angstroms) |           |          |
|------------------|------------------|----------------|-------------------------|-----------|----------|
|                  |                  |                | X                       | Y         | Z        |
| 1                | 6                | 0              | 0.016528                | -3.003743 | 0.182278 |
| 2                | 6                | 0              | -1.184065               | -2.294801 | 0.120088 |
| 3                | 6                | 0              | -1.22694                | -0.891984 | 0.02226  |
| 4                | 6                | 0              | -0.001727               | -0.154509 | 0.000897 |
| 5                | 6                | 0              | 1.236291                | -0.874635 | 0.032857 |
| 6                | 6                | 0              | 1.209806                | -2.272802 | 0.131456 |
| 7                | 6                | 0              | -2.482232               | -0.163678 | 0.000128 |

|    |   |   |           |           |           |
|----|---|---|-----------|-----------|-----------|
| 8  | 6 | 0 | -0.011433 | 1.276392  | -0.017997 |
| 9  | 6 | 0 | -1.258901 | 1.974496  | -0.020051 |
| 10 | 6 | 0 | -2.466991 | 1.205337  | 0.001252  |
| 11 | 6 | 0 | -1.256947 | 3.393546  | -0.015793 |
| 12 | 6 | 0 | -0.031721 | 4.065756  | 0.009482  |
| 13 | 6 | 0 | 1.203894  | 3.410188  | -0.006302 |
| 14 | 6 | 0 | 1.226121  | 1.992487  | -0.010424 |
| 15 | 6 | 0 | 2.446231  | 1.24046   | 0.019644  |
| 16 | 6 | 0 | 2.481851  | -0.127184 | 0.019355  |
| 17 | 1 | 0 | 3.384166  | 1.783413  | 0.0273    |
| 18 | 1 | 0 | -2.124624 | -2.825799 | 0.170674  |
| 19 | 1 | 0 | 2.156277  | -2.796393 | 0.192833  |
| 20 | 1 | 0 | -3.412975 | 1.734224  | 0.003018  |
| 21 | 1 | 0 | -0.03897  | 5.151723  | -0.014895 |
| 22 | 6 | 0 | 2.439509  | 4.243439  | -0.033434 |
| 23 | 6 | 0 | 2.651215  | 5.222062  | 0.951826  |
| 24 | 6 | 0 | 3.388725  | 4.121363  | -1.06274  |
| 25 | 6 | 0 | 3.777646  | 6.044013  | 0.916868  |
| 26 | 1 | 0 | 1.929283  | 5.325944  | 1.757521  |
| 27 | 6 | 0 | 4.514788  | 4.943434  | -1.098761 |
| 28 | 1 | 0 | 3.230093  | 3.388279  | -1.848612 |
| 29 | 6 | 0 | 4.714961  | 5.906877  | -0.108223 |
| 30 | 1 | 0 | 3.924244  | 6.789809  | 1.693946  |
| 31 | 1 | 0 | 5.23292   | 4.835587  | -1.907508 |
| 32 | 1 | 0 | 5.592854  | 6.546768  | -0.136705 |
| 33 | 6 | 0 | -2.504353 | 4.208553  | -0.052262 |
| 34 | 6 | 0 | -2.737161 | 5.184826  | 0.930571  |
| 35 | 6 | 0 | -3.444656 | 4.071604  | -1.087889 |
| 36 | 6 | 0 | -3.875162 | 5.990268  | 0.886989  |
| 37 | 1 | 0 | -2.022441 | 5.299842  | 1.741159  |
| 38 | 6 | 0 | -4.582274 | 4.877153  | -1.132506 |
| 39 | 1 | 0 | -3.270057 | 3.340116  | -1.871854 |
| 40 | 6 | 0 | -4.803275 | 5.83854   | -0.144388 |
| 41 | 1 | 0 | -4.037969 | 6.734554  | 1.662288  |
| 42 | 1 | 0 | -5.293207 | 4.758047  | -1.946017 |
| 43 | 1 | 0 | -5.69021  | 6.465498  | -0.17956  |
| 44 | 6 | 0 | -3.800138 | -0.860627 | -0.011331 |
| 45 | 6 | 0 | -4.767199 | -0.576643 | 0.965919  |
| 46 | 6 | 0 | -4.150477 | -1.769451 | -1.01947  |
| 47 | 6 | 0 | -6.021476 | -1.179465 | 0.933805  |
| 48 | 1 | 0 | -4.524537 | 0.118383  | 1.765362  |
| 49 | 6 | 0 | -5.410496 | -2.369488 | -1.04771  |

|    |   |   |           |           |           |
|----|---|---|-----------|-----------|-----------|
| 50 | 1 | 0 | -3.435026 | -1.998341 | -1.804816 |
| 51 | 6 | 0 | -6.378433 | -2.09278  | -0.072365 |
| 52 | 1 | 0 | -6.733715 | -0.93156  | 1.716291  |
| 53 | 1 | 0 | -5.631248 | -3.058421 | -1.855784 |
| 54 | 6 | 0 | 3.808071  | -0.807642 | 0.016247  |
| 55 | 6 | 0 | 4.173527  | -1.714303 | -0.993725 |
| 56 | 6 | 0 | 4.764724  | -0.515759 | 0.996145  |
| 57 | 6 | 0 | 5.436869  | -2.296919 | -1.012188 |
| 58 | 1 | 0 | 3.4645    | -1.949307 | -1.783059 |
| 59 | 6 | 0 | 6.030654  | -1.10521  | 0.973623  |
| 60 | 1 | 0 | 4.510869  | 0.175674  | 1.795256  |
| 61 | 6 | 0 | 6.400353  | -2.010914 | -0.02871  |
| 62 | 1 | 0 | 5.676285  | -2.984498 | -1.819052 |
| 63 | 1 | 0 | 6.729851  | -0.846599 | 1.761301  |
| 64 | 6 | 0 | 0.069986  | -4.5376   | 0.316045  |
| 65 | 6 | 0 | 0.841935  | -5.132131 | -0.886042 |
| 66 | 6 | 0 | 0.79874   | -4.91419  | 1.628119  |
| 67 | 6 | 0 | -1.332184 | -5.174744 | 0.34702   |
| 68 | 1 | 0 | 0.343239  | -4.888186 | -1.831248 |
| 69 | 1 | 0 | 1.867513  | -4.752409 | -0.940795 |
| 70 | 1 | 0 | 0.895135  | -6.22463  | -0.802164 |
| 71 | 1 | 0 | 0.26852   | -4.512436 | 2.499109  |
| 72 | 1 | 0 | 0.8515    | -6.004749 | 1.735187  |
| 73 | 1 | 0 | 1.822463  | -4.52669  | 1.652309  |
| 74 | 1 | 0 | -1.239822 | -6.263208 | 0.435466  |
| 75 | 1 | 0 | -1.92228  | -4.823079 | 1.200712  |
| 76 | 1 | 0 | -1.897545 | -4.963983 | -0.567839 |
| 77 | 6 | 0 | -7.776168 | -2.737474 | -0.069077 |
| 78 | 6 | 0 | 7.784979  | -2.680515 | -0.087678 |
| 79 | 6 | 0 | 8.483985  | -2.301903 | -1.415258 |
| 80 | 1 | 0 | 8.623561  | -1.217359 | -1.488921 |
| 81 | 1 | 0 | 9.470839  | -2.777094 | -1.476223 |
| 82 | 1 | 0 | 7.905138  | -2.623791 | -2.287286 |
| 83 | 6 | 0 | 8.696363  | -2.244409 | 1.075134  |
| 84 | 1 | 0 | 9.667208  | -2.745754 | 0.991097  |
| 85 | 1 | 0 | 8.880959  | -1.164176 | 1.06601   |
| 86 | 1 | 0 | 8.270585  | -2.510719 | 2.049254  |
| 87 | 6 | 0 | 7.618152  | -4.217261 | -0.018043 |
| 88 | 1 | 0 | 7.133236  | -4.516698 | 0.918146  |
| 89 | 1 | 0 | 7.011265  | -4.599544 | -0.84552  |
| 90 | 1 | 0 | 8.596913  | -4.710225 | -0.066973 |
| 91 | 6 | 0 | -7.972668 | -3.533979 | 1.24291   |

|     |   |   |           |           |           |
|-----|---|---|-----------|-----------|-----------|
| 92  | 1 | 0 | -7.882577 | -2.89311  | 2.126211  |
| 93  | 1 | 0 | -8.968179 | -3.994316 | 1.264792  |
| 94  | 1 | 0 | -7.226929 | -4.332197 | 1.332082  |
| 95  | 6 | 0 | -7.978539 | -3.704112 | -1.251264 |
| 96  | 1 | 0 | -8.984215 | -4.137127 | -1.205968 |
| 97  | 1 | 0 | -7.88209  | -3.194204 | -2.216592 |
| 98  | 1 | 0 | -7.261333 | -4.532523 | -1.22849  |
| 99  | 6 | 0 | -8.854267 | -1.631428 | -0.161905 |
| 100 | 1 | 0 | -9.857702 | -2.07467  | -0.153033 |
| 101 | 1 | 0 | -8.792618 | -0.930243 | 0.676897  |
| 102 | 1 | 0 | -8.745258 | -1.054885 | -1.087591 |

---

Total Energy (RB3LYP) = -2011.75125435 Harterr

## 6. X-Ray Crystallography

Table S2 Summary of crystal data for **3b**.

| Parameter                             | <b>3b</b>                       |
|---------------------------------------|---------------------------------|
| Empirical formula                     | C <sub>52</sub> H <sub>50</sub> |
| Formula weight [g mol <sup>-1</sup> ] | 674.92                          |
| Crystal system                        | Triclinic                       |
| Space group                           | <i>P</i> -1                     |
| <i>a</i> [Å]                          | 9.2562(4)                       |
| <i>b</i> [Å]                          | 13.5966(5)                      |
| <i>c</i> [Å]                          | 17.0228(7)                      |
| $\alpha$ [°]                          | 106.122(2)                      |
| $\beta$ [°]                           | 91.734(2)                       |
| $\gamma$ [°]                          | 106.113(2)                      |
| Volume [Å <sup>3</sup> ]              | 1963.85(14)                     |
| <i>Z</i>                              | 2                               |
| Density, calcd [g cm <sup>-3</sup> ]  | 1.141                           |
| Temperature (K)                       | 152.93                          |
| Reflections collected                 | 28307                           |
| Parameters                            | 546                             |
| <i>R</i> <sub>int</sub>               | 0.0395                          |
| R[I>2σ(I)] <sup>a</sup>               | 0.0843                          |
| wR[I>2σ(I)] <sup>b</sup>              | 0.2503                          |
| GOF on F <sup>2</sup>                 | 1.051                           |

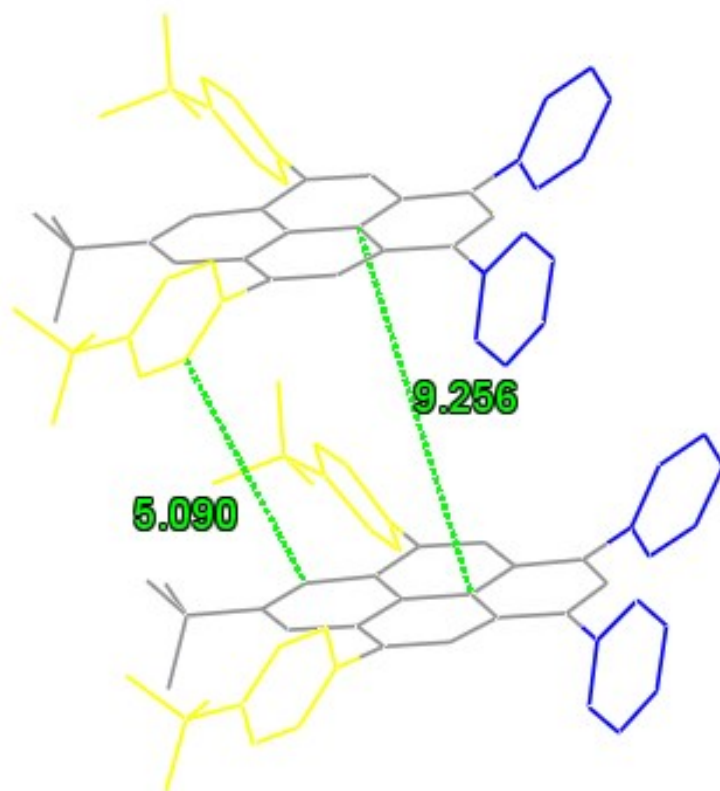

**Figure S4.** Packing distances and conformations in **3b**: The shortest contact between pyrene ring and a substituent on a neighboring molecule is 5.090Å, and the centroid • • • centroid distance is 9.256 Å

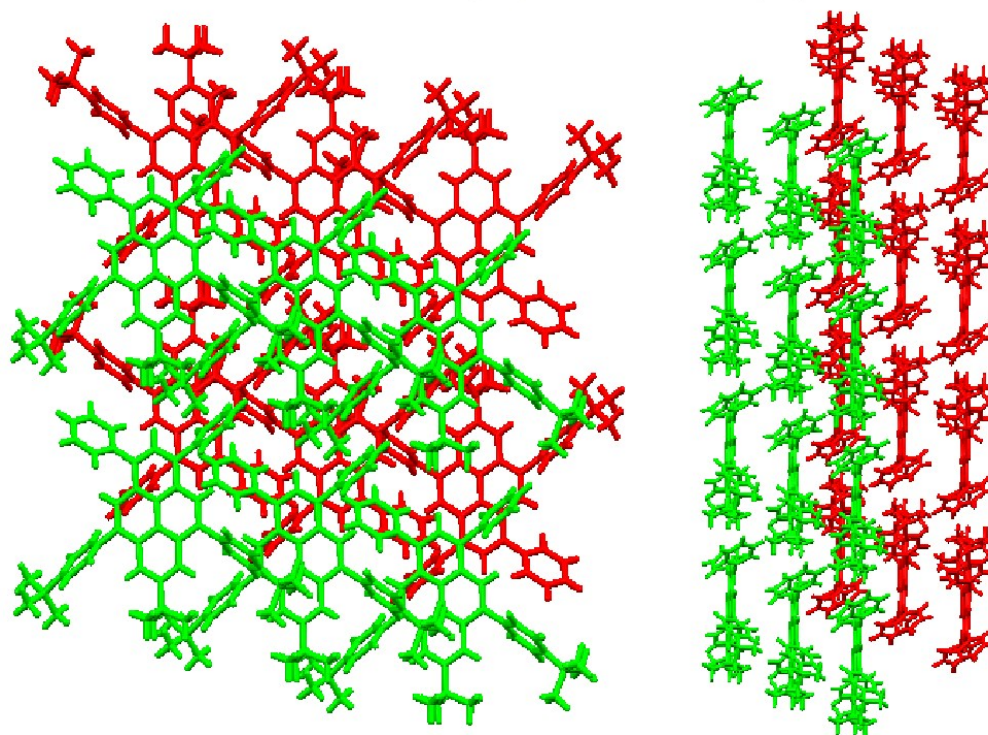

**Figure S5.** Packing plots for **3b**: Top view (left) and side view (right).

## 7. FT-IR spectrum

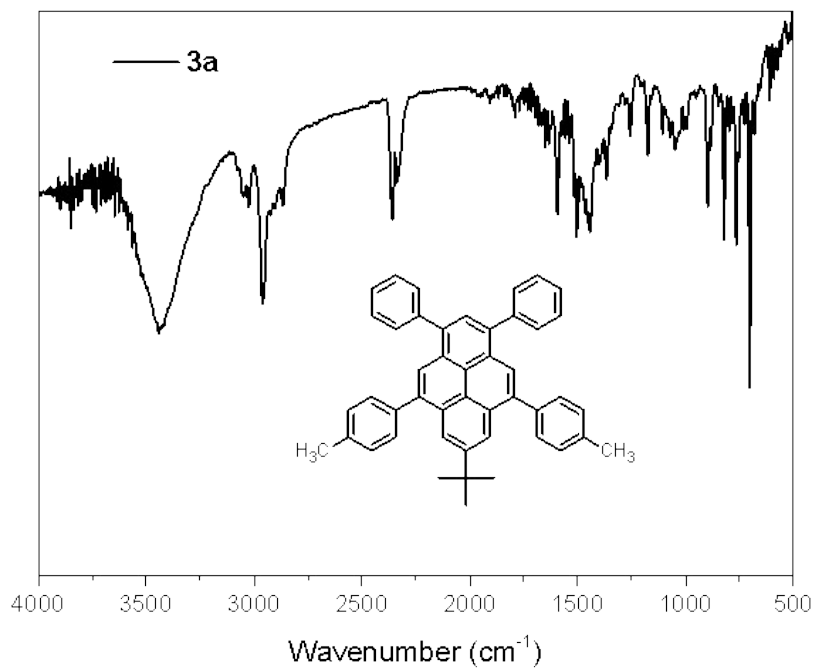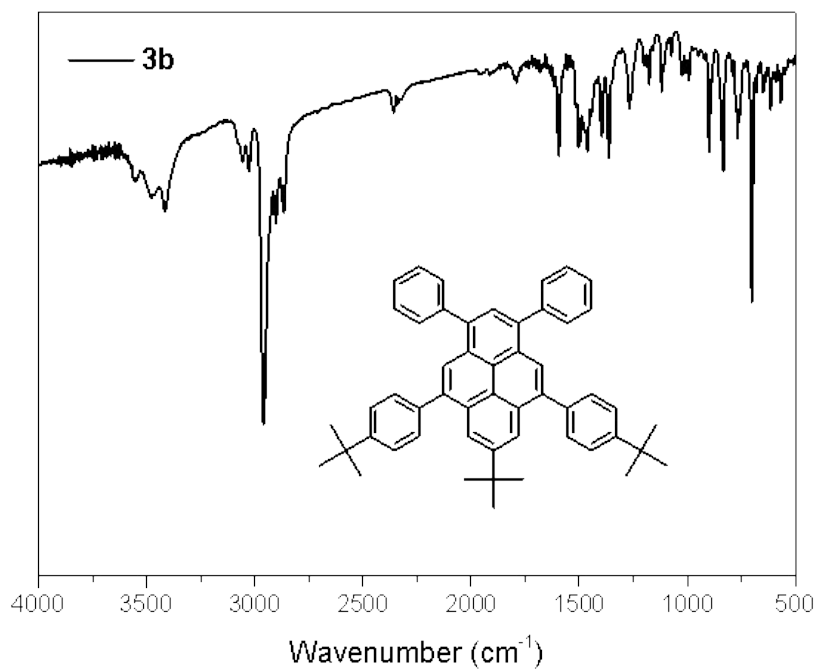

**Figure S6.** FT-IR spectra of the DA pyrenes **3a** and **3b**.



## 8. Photophysical Properties

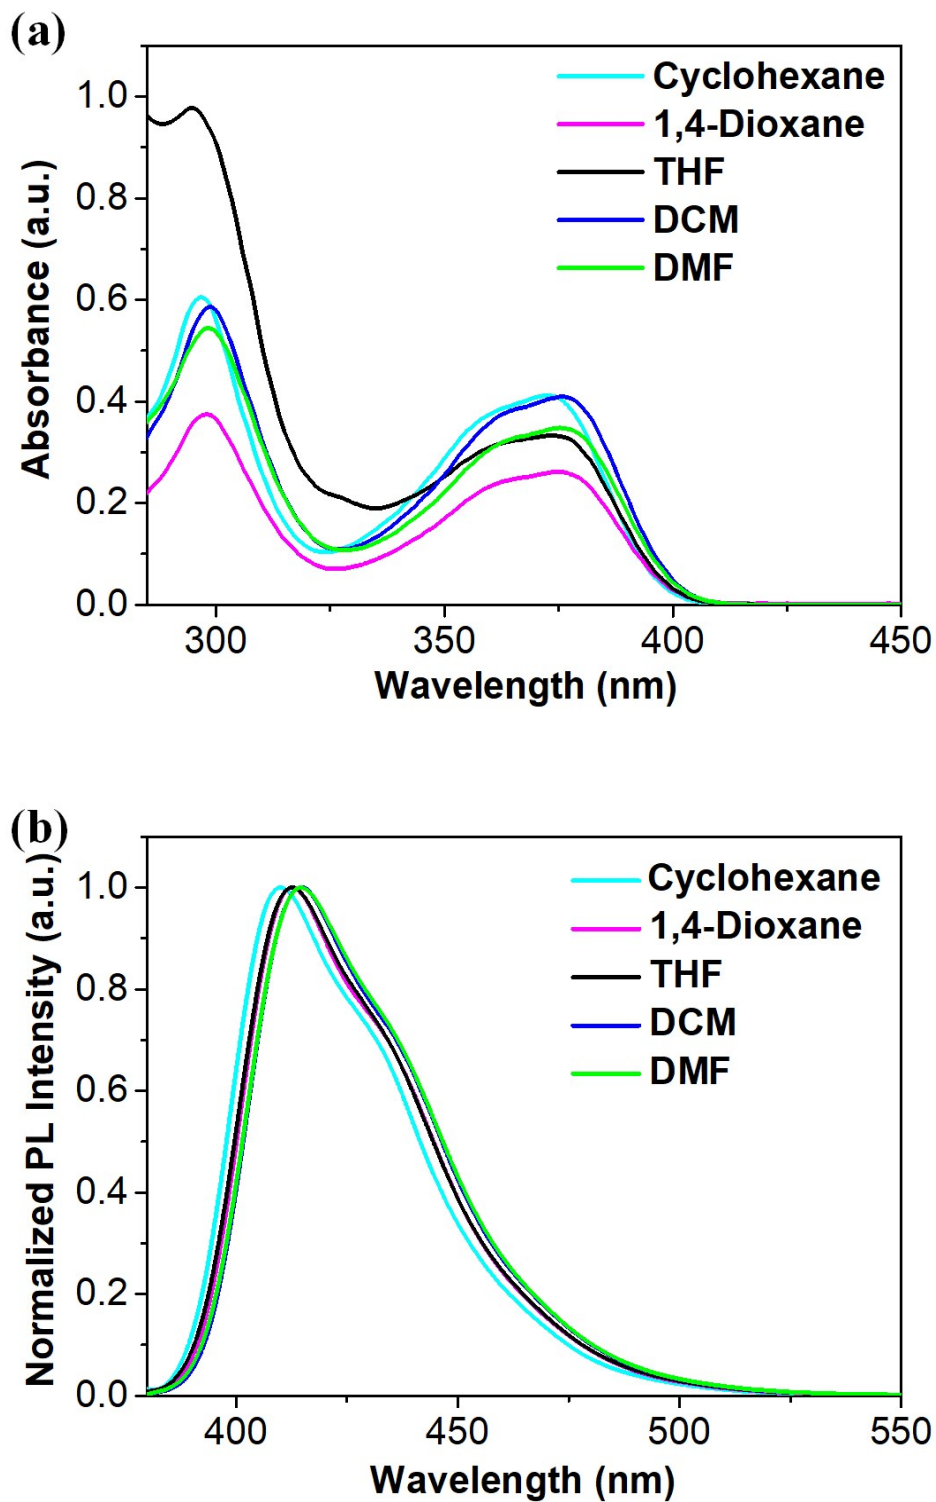

**Figure S7.** UV/Vis absorption (a) and fluorescence spectra (b) of the compound **3a** recorded in five different solvents.

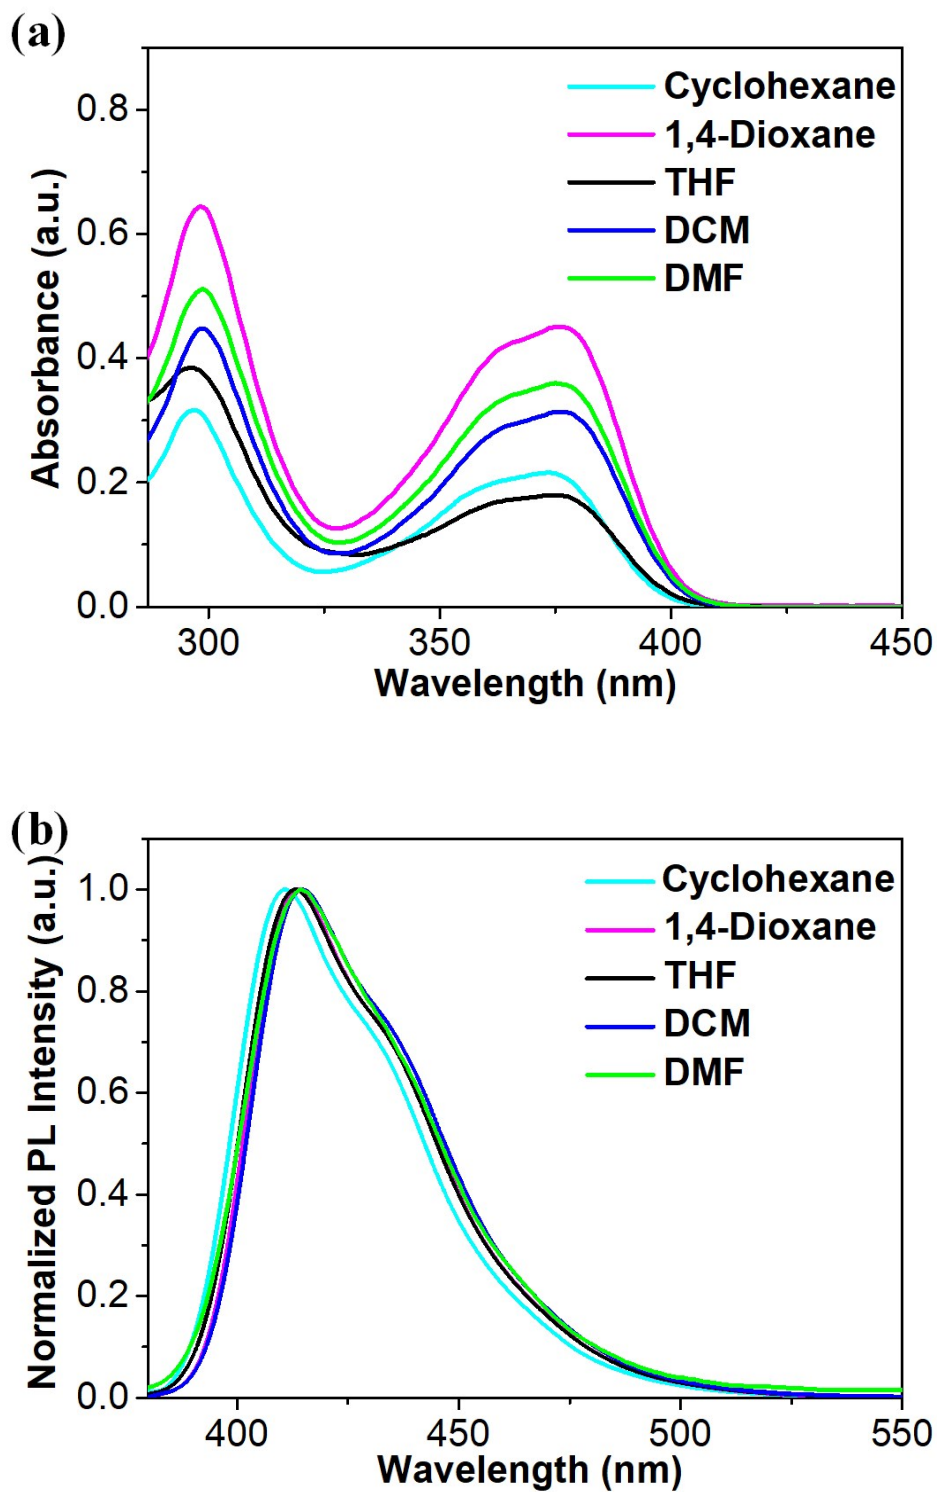

**Figure S8.** UV/Vis absorption (a) and fluorescence spectra (b) of the compound **3b** recorded in five different solvents.

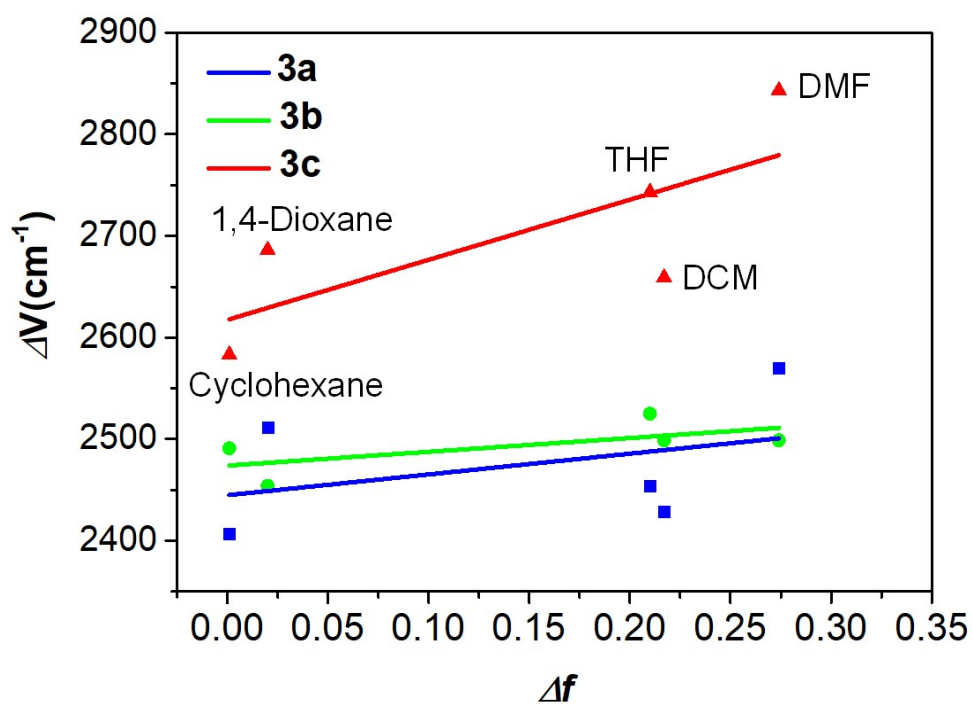

**Figure S9.** Linear correlation of orientation polarization ( $f$ ) of solvent media with the Stokes-shifts for the compounds **3a-c**.

**Table S3** Spectroscopic parameter of **3a**, **3b** and **3c** in different organic solvents.

| solvent                  | $\Delta f$ | Stokes shift [ $\text{cm}^{-1}$ ] |           |                        | $\lambda_{\text{abs, max}}$ [nm] |           |                        | $\lambda_{\text{em, max}}$ [nm] |           |                        | $\Phi_f$ [%] |           |                        |
|--------------------------|------------|-----------------------------------|-----------|------------------------|----------------------------------|-----------|------------------------|---------------------------------|-----------|------------------------|--------------|-----------|------------------------|
|                          |            | <b>3a</b>                         | <b>3b</b> | <b>3c<sup>II</sup></b> | <b>3a</b>                        | <b>3b</b> | <b>3c<sup>II</sup></b> | <b>3a</b>                       | <b>3b</b> | <b>3c<sup>II</sup></b> | <b>3a</b>    | <b>3b</b> | <b>3c<sup>II</sup></b> |
| Cyclohexane              | 0          | 2407                              | 2491      | 2583                   | 374                              | 372       | 374                    | 411                             | 410       | 414                    | 69           | 66        | 63                     |
| 1,4-Dioxane              | 0.020      | 2512                              | 2454      | 2686                   | 375                              | 375       | 375                    | 414                             | 413       | 417                    | 76           | 76        | 71                     |
| THF                      | 0.210      | 2454                              | 2525      | 2743                   | 375                              | 374       | 375                    | 413                             | 413       | 418                    | 66           | 62        | 60                     |
| $\text{CH}_2\text{Cl}_2$ | 0.217      | 2429                              | 2499      | 2659                   | 377                              | 376       | 377                    | 415                             | 415       | 419                    | 68           | 67        | 74                     |
| DMF                      | 0.274      | 2570                              | 2499      | 2843                   | 375                              | 376       | 376                    | 415                             | 415       | 421                    | 67           | 78        | 74                     |

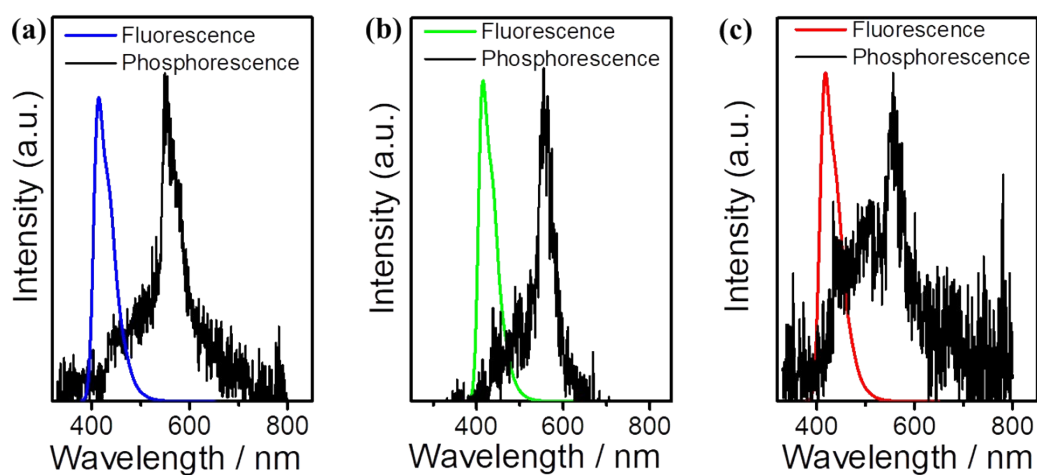

**Figure S10.** The fluorescence (at room temperature) and phosphorescence (at 77K) spectra of **3a-c** in toluene.

## 9. OLED Performance

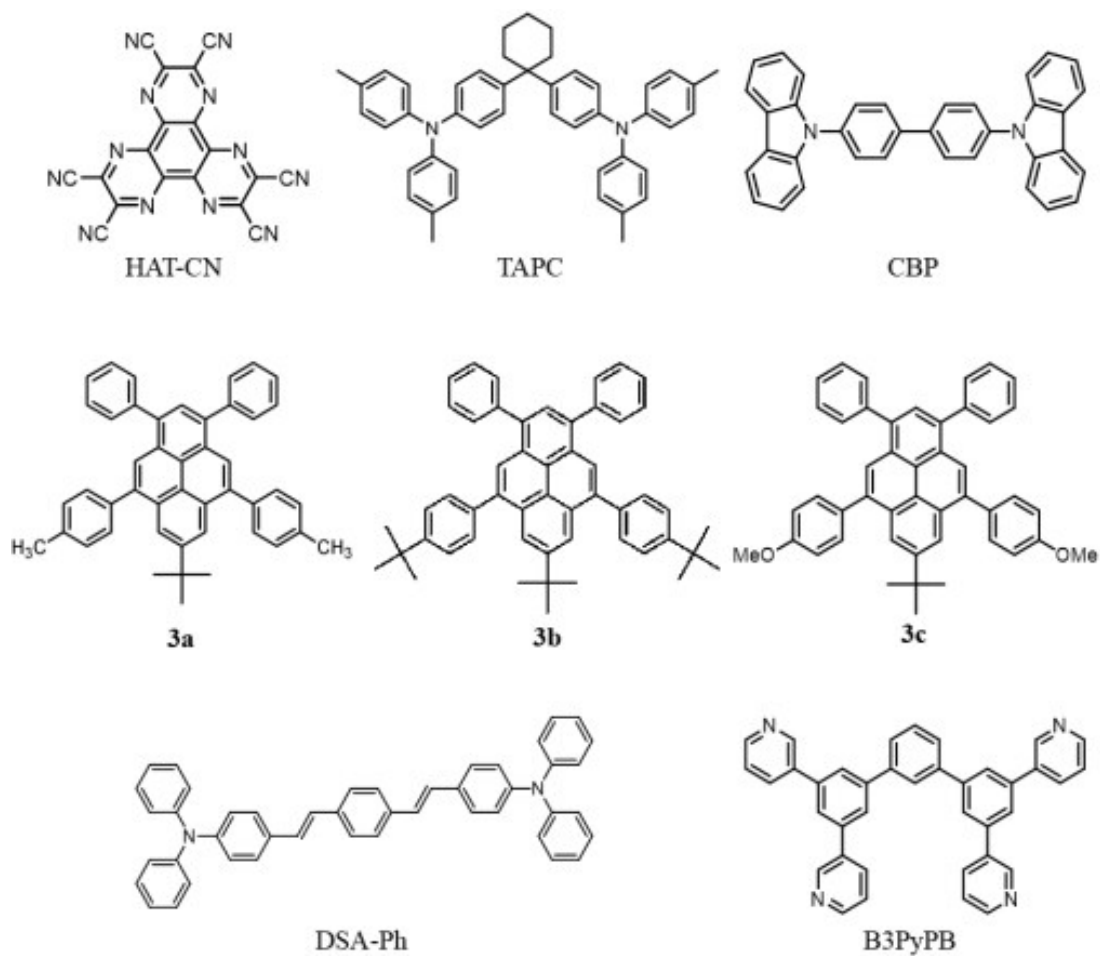

**Figure S11.** Molecular structures of the materials used in devices A-D.

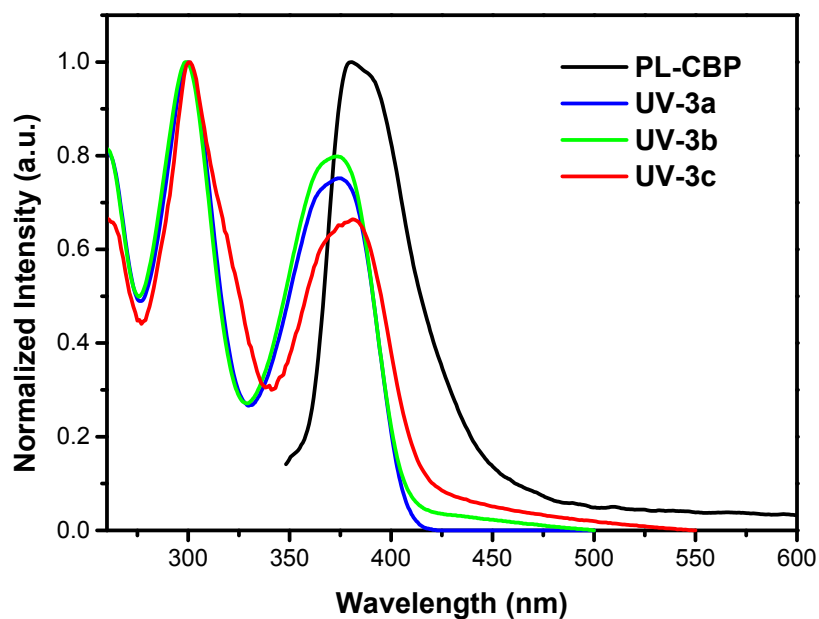

**Figure S12.** UV-vis absorption spectra of **3a-c** in a neat film and PL of CBP in a film.

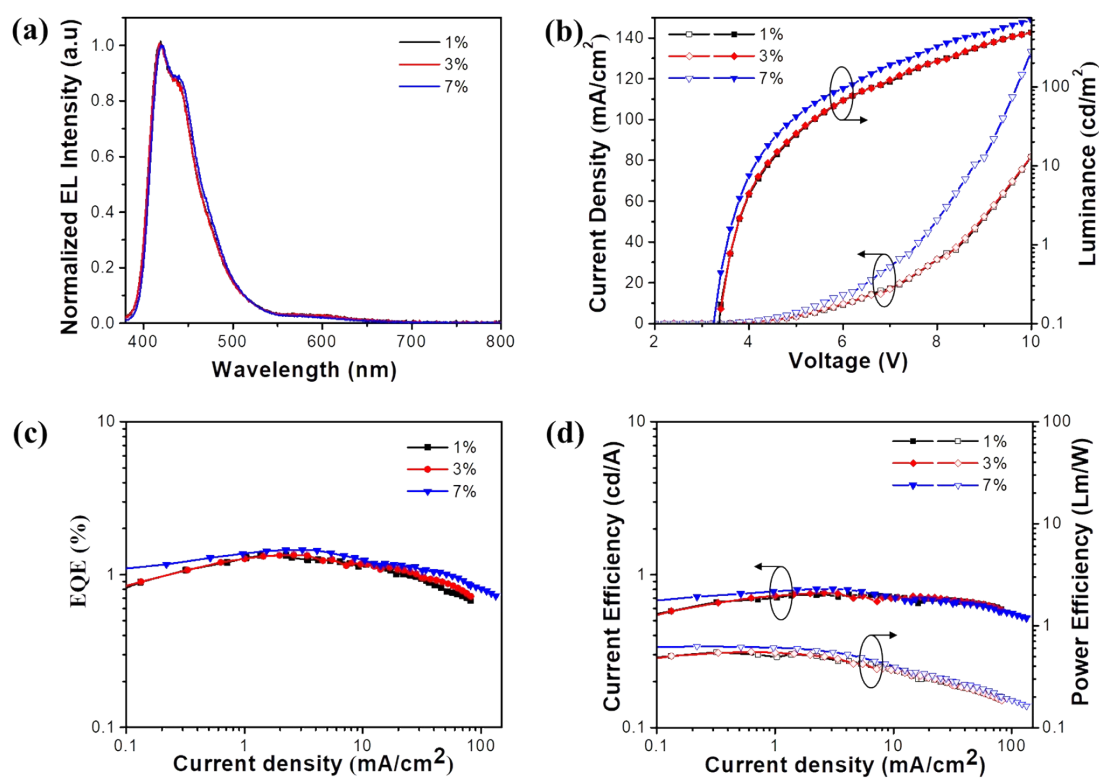

**Figure S13.** Doping concentration dependent EL performance of device based-**3a**: (a) EL spectra; (b) J-V-L curve; (c) CE-L-PE curve; (d) EQE-L curve.

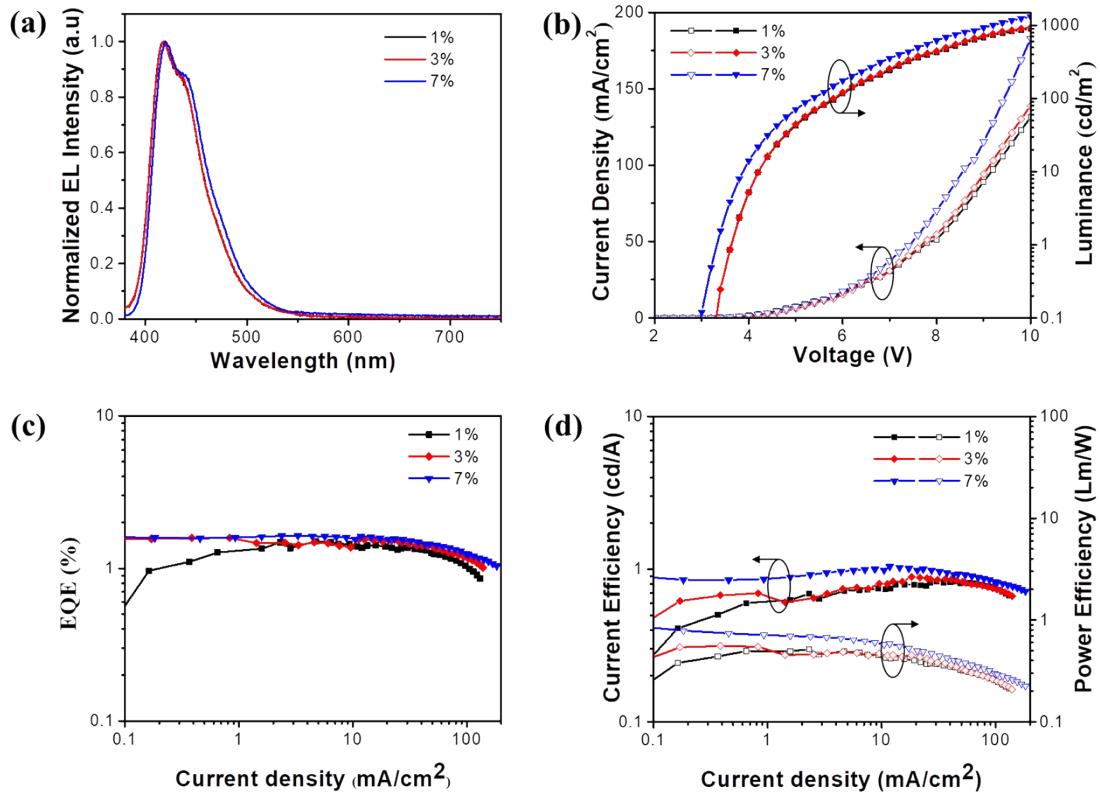

**Figure S14.** Doping concentration dependent EL performance of device based-3b: (a) EL spectra; (b) J-V-L curve; (c) CE-L-PE curve; (d) EQE-L curve.

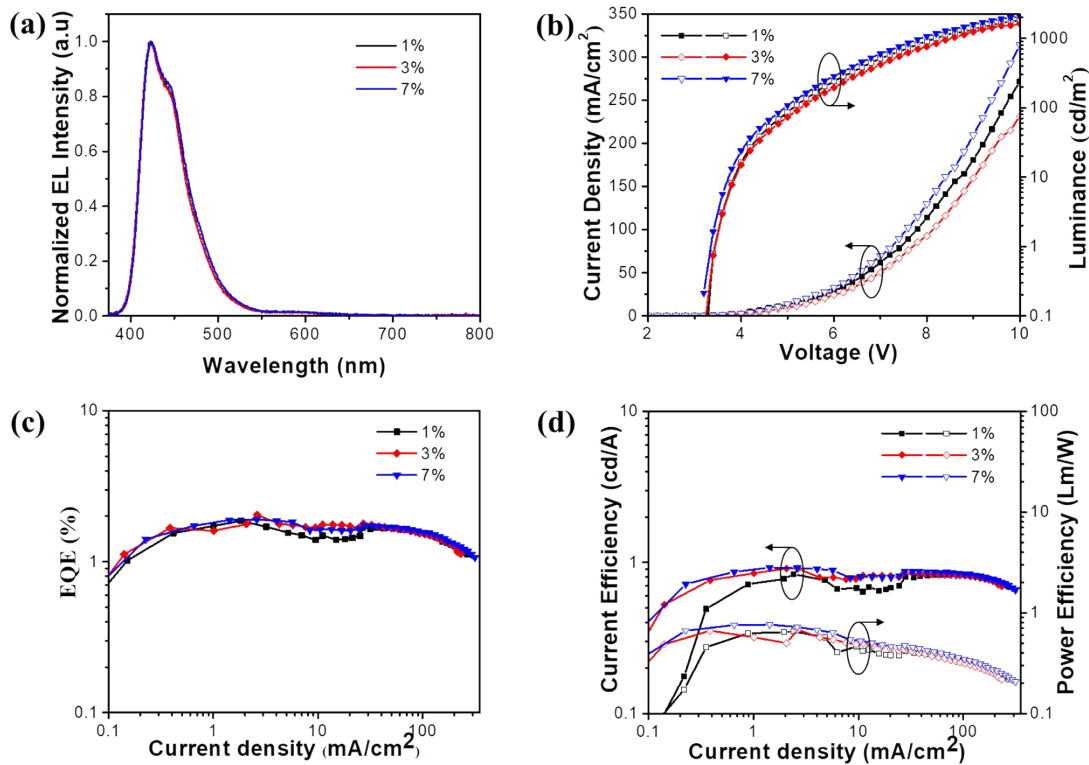

**Figure S15.** Doping concentration dependent EL performance of device based-3c: (a) EL spectra; (b) J-V-L curve; (c) CE-L-PE curve; (d) EQE-L curve.

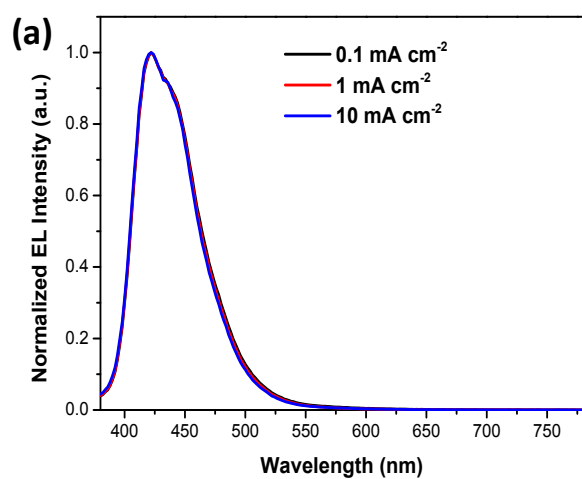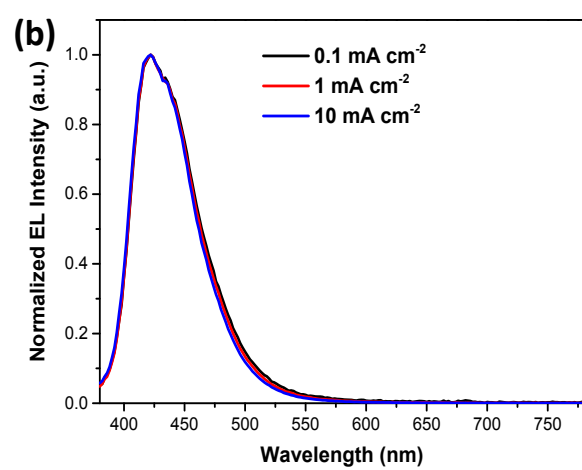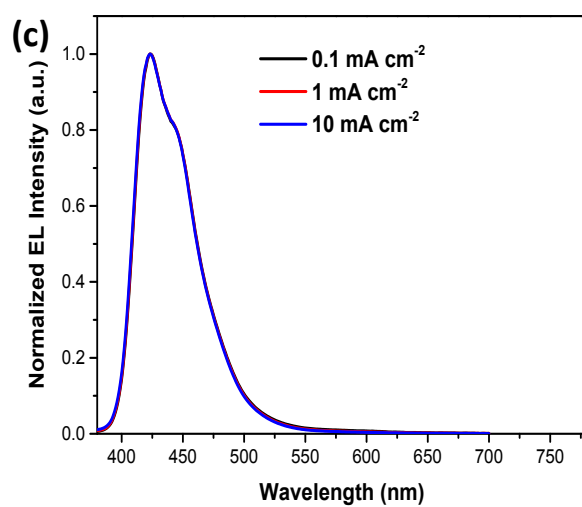

**Figure S16.** EL spectra stability of device A (a), device B (b) and device C (c) under different current densities.

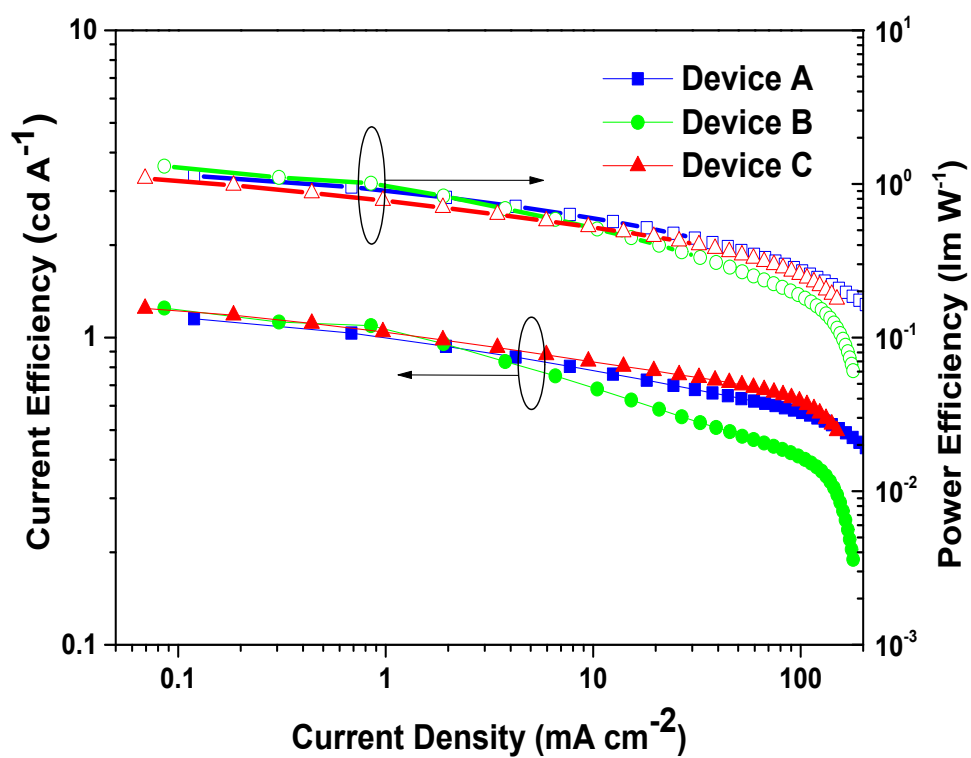

**Figure S17.** Performance of representative devices current efficiency (CE) and power efficiency (PE) versus current density characteristics of device A-C.



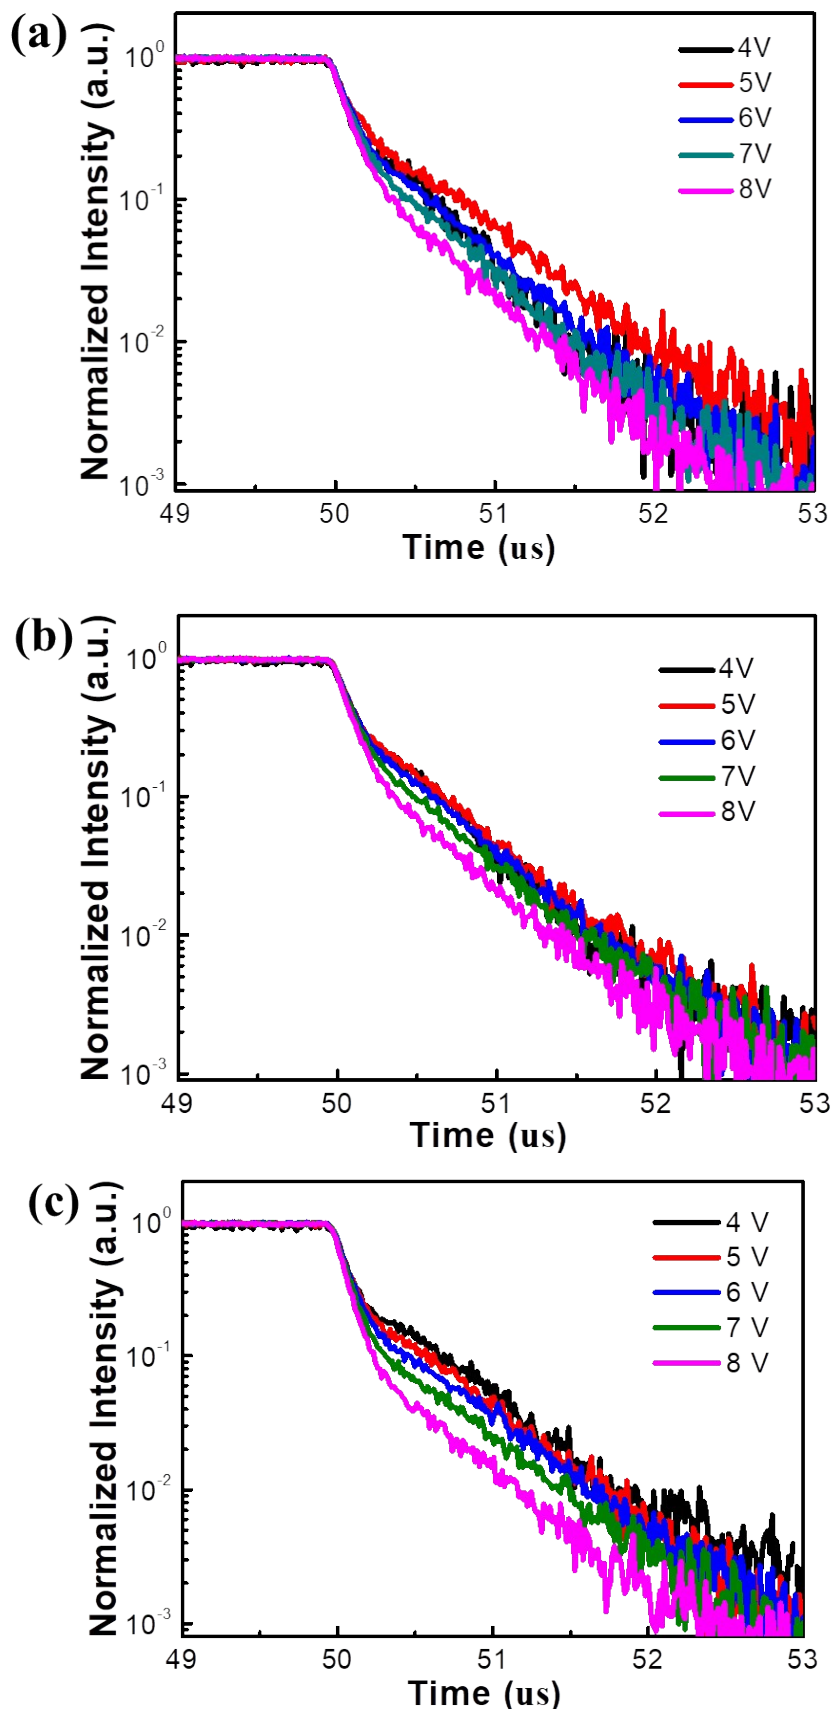

**Figure S18.** Transient EL decay of device A (a), device B (b) and device C (c) at different voltages.

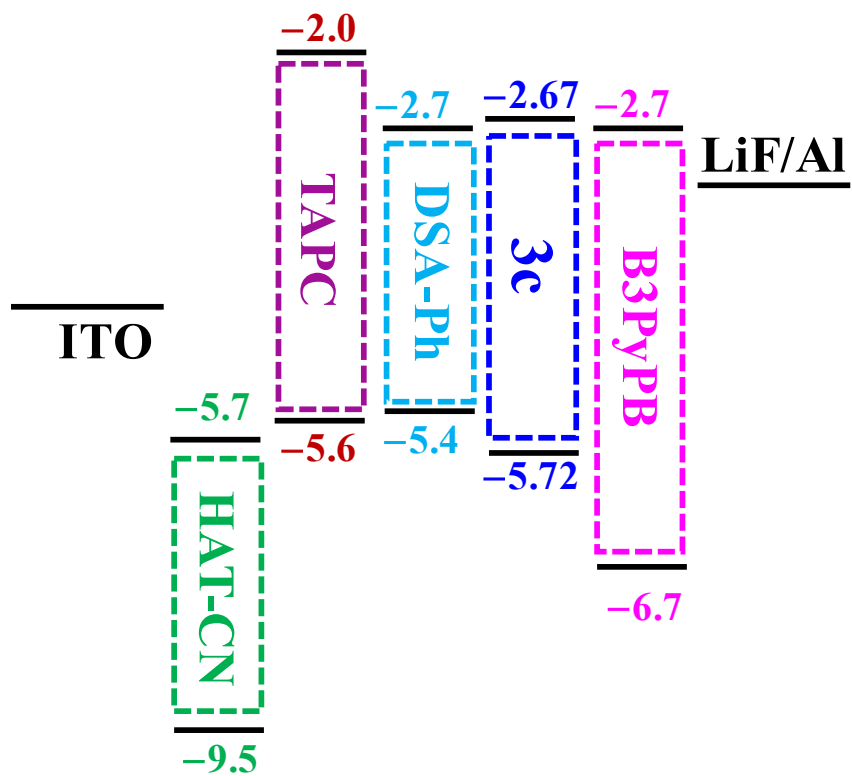

**Figure S19.** Energy level diagrams of device D.

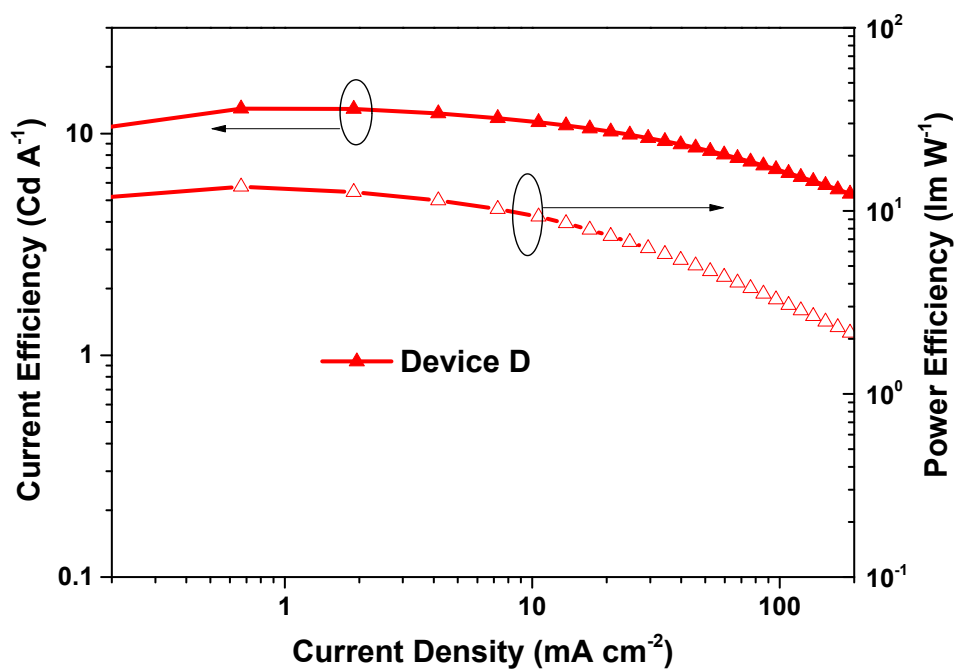

**Figure S20.** Current efficiency (CE) and power efficiency (PE) versus current density characteristics of device D.

## 10. NMR Spectra

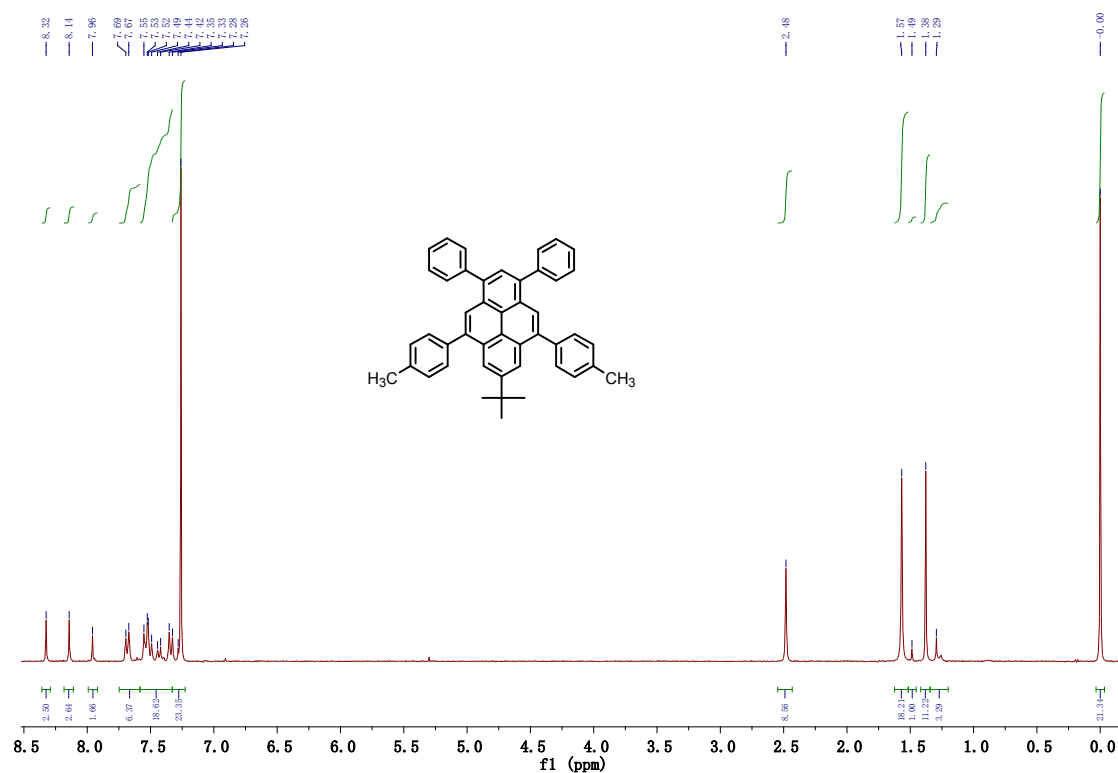

**Figure S21.** <sup>1</sup>H NMR spectrum of **3a** (300 MHz, CDCl<sub>3</sub>, *r.t.*).

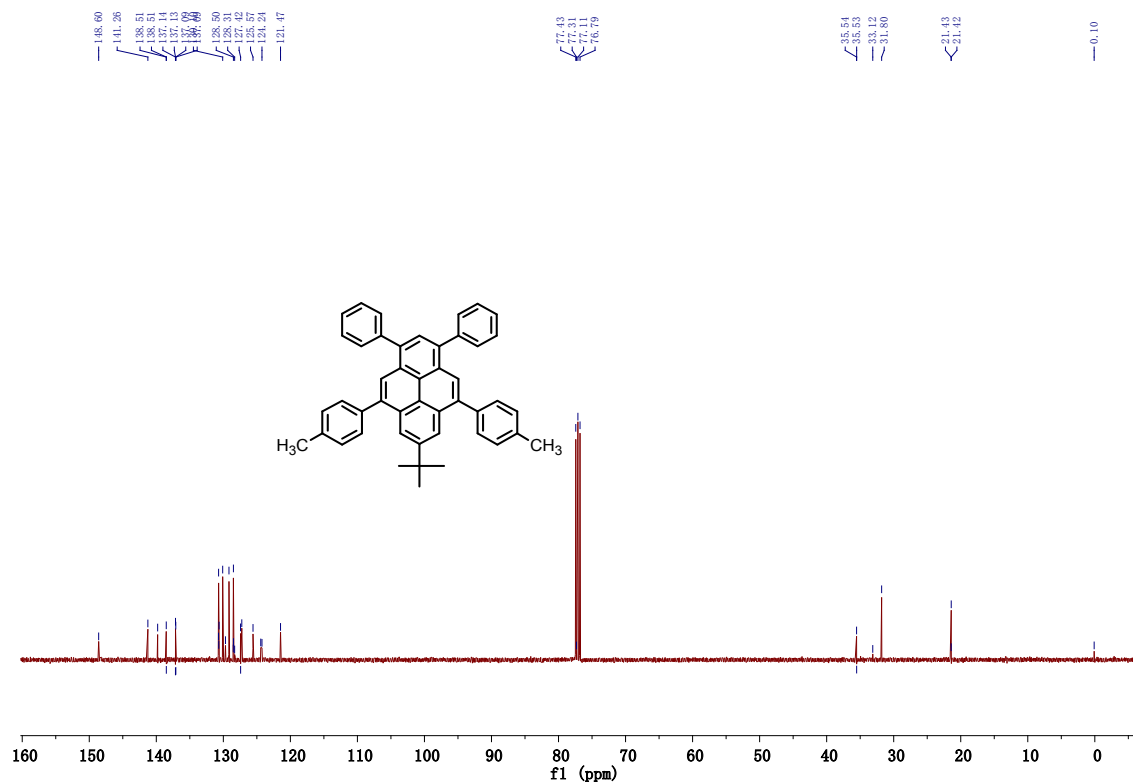

**Figure S22.** <sup>13</sup>C NMR spectra of **3a** (100MHz, CDCl<sub>3</sub>, *r.t.*)

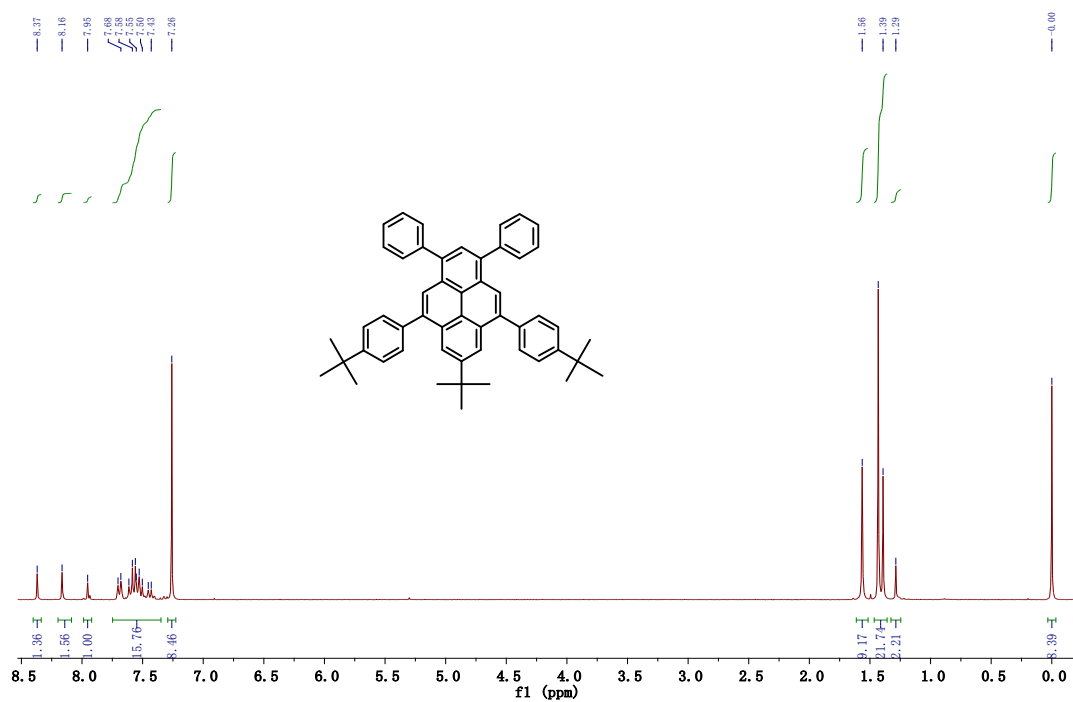

**Figure S23.**  $^1\text{H}$  NMR spectrum of **3b** (300 MHz,  $\text{CDCl}_3$ , *r.t.*).

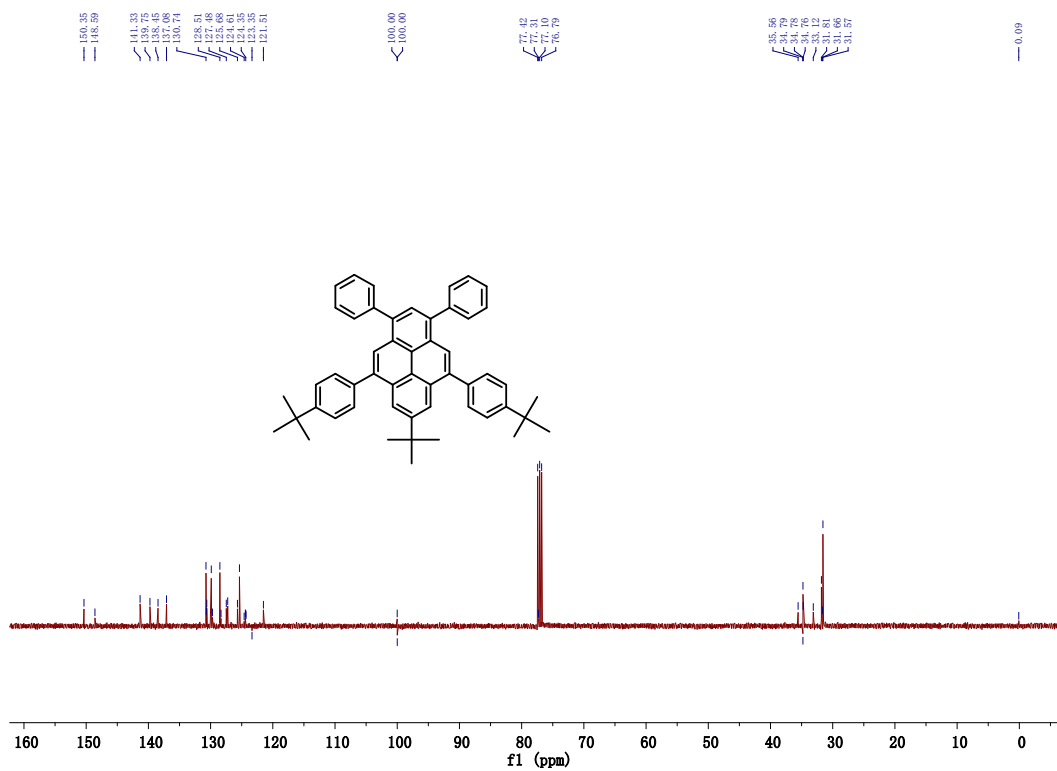

**Figure S24.**  $^{13}\text{C}$  NMR spectra of **3b** (100MHz,  $\text{CDCl}_3$ , *r.t.*)

## 11. Mass Spectra

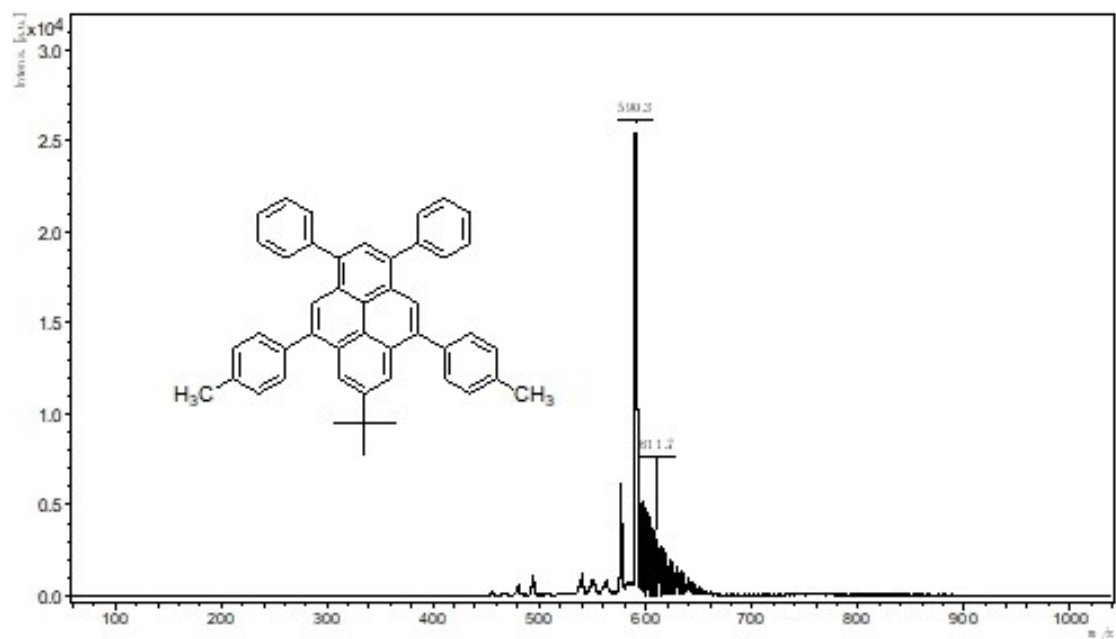

Figure S25. Mass spectra of **3a**.

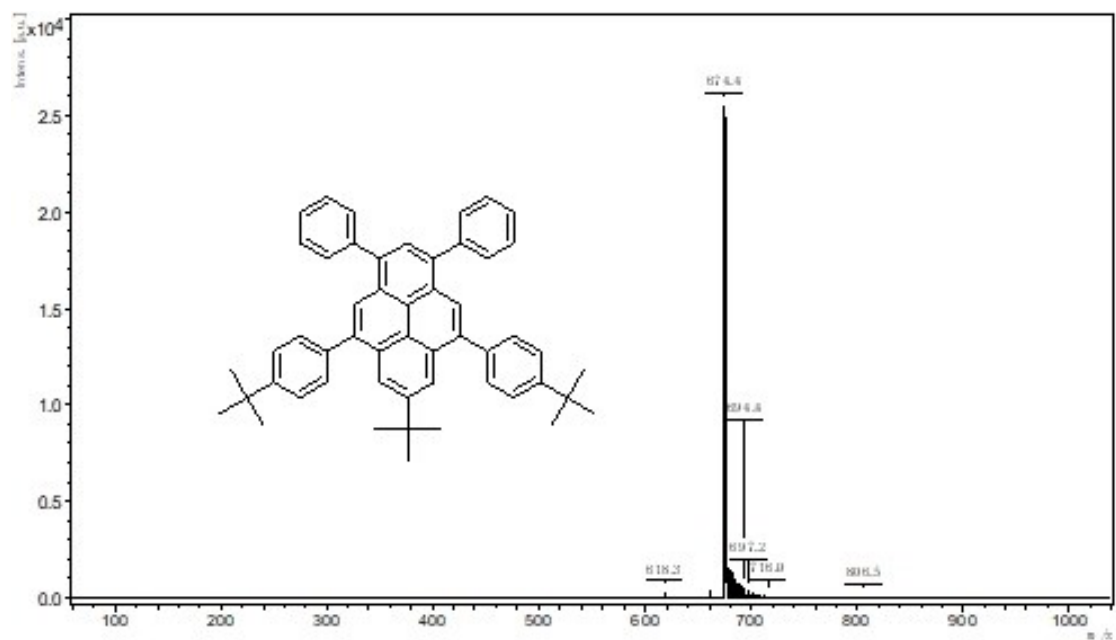

Figure S26. Mass spectra of **3b**.

## 12. References

1. R. Liu, H. Ran, Z. Zhao, X. Yang, J. Zhang, L. Chen, H. Sun and J.-Y. Hu, *ACS Omega*, **2018**, *3*, 5866.
